# Supplementary material for: Energy transfer on a two-dimensional antenna enhances the photocatalytic activity of CO2 reduction by metal–organic layers
Source: Royal Society of Chemistry journal article supplement (doi:10.1039/c9cc04594e), 2019-01-01
Supplement: c9cc04594e1.pdf [file c9cc04594e1.pdf]

## Supporting Information

### **Energy Transfer on Two-Dimensional Antenna Enhances**

### **Photocatalytic Activity of CO<sub>2</sub> Reduction by Metal-Organic Layers**

Xuefu Hu,<sup>a</sup> Peican Chen,<sup>a</sup> Cankun Zhang,<sup>a</sup> Zhiye Wang<sup>a</sup> and Cheng Wang<sup>\*a</sup>

a. iChem, State Key Laboratory of Physical Chemistry of Solid Surfaces, College of Chemistry and Chemical Engineering, Xiamen University, Xiamen 361005, P. R. China.

E-mail: wangchengxmu@xmu.edu.cn

## General Methods

All the reagents and solvents were commercially available and used without further purification unless otherwise indicated.  $^1\text{H-NMR}$  spectra were recorded on a Bruker NMR 500 DRX spectrometer and a Bruker 400 MHz DRX spectrometer and referenced to the proton resonance resulting from incomplete deuteration of the  $\text{D}_2\text{O}$  ( $\delta$  4.7). Electron microscopy images were obtained on a Tecnai F30 and JEOL 2100 High Resolution Transmission Electron Microscope. The powder X-ray diffraction data were collected on Rigaku diffractometers using  $\text{Cu K}\alpha$  radiation sources ( $\lambda = 1.54178 \text{ \AA}$ ). The fluorescence spectrums and decay curve were obtained on a Edinburgh Instrument FL980. ICP-MS analysis of samples were performed on an ELAN ICP-DRC-qMS (PerkinElmer, SCIEX, Canada) instrument.

Zr-TCBPE-MOL-Ru and Zr-TCBPE-MOL-Re were prepared by post-modification of Zr-TCBPE-MOL with DMF solution of 3 mM  $[\text{H}_2\text{BPYDC-Ru}(\text{BPY})_2]\text{Cl}_2$  and DMF solution of 1.5 mM  $\text{H}_2\text{BPYDC-Re}(\text{CO})_3\text{Cl}$  with stirring at room temperature. Zr-TCBPE-MOL-BPYDC-Ir was prepared in two steps: first preparing a DMF solution of 5mM  $\text{H}_2\text{BPYDC-IrCp}^*(\text{NO}_3)_2$  by reacting  $\text{H}_2\text{BPYDC}$  with  $\text{IrCp}^*(\text{NO}_3)_2$  that was prepared by treating  $\text{Ir}_2\text{Cp}^*_2\text{Cl}_4$  dimer with  $\text{AgNO}_3$ , and then modifying Zr-TCBPE-MOL with  $\text{H}_2\text{BPYDC-IrCp}^*(\text{NO}_3)_2$  at room temperature.

## Materials Characterization

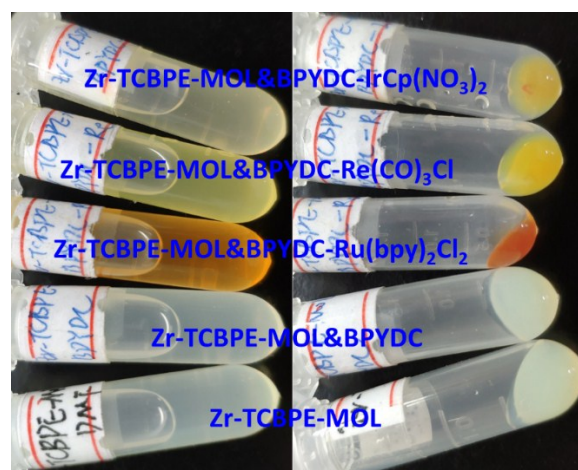

Figure s1 The photo of Zr-TCBPE-MOL and the functionalized MOLs dispersed in DMF(left) and as a solid gel (right)

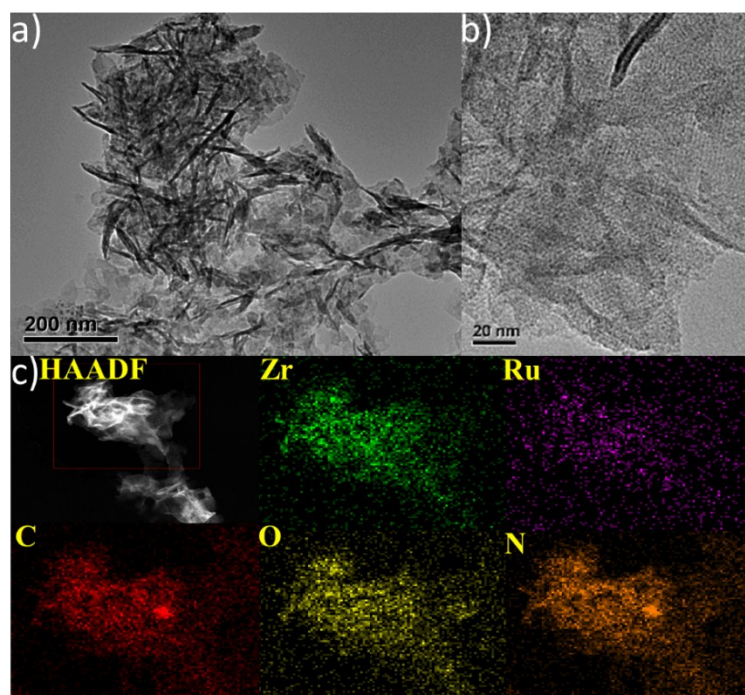

Figure s2 a). The TEM image of Zr-TCBPE-MOL-Ru, b). HRTEM of Zr-TCBPE-MOL-Ru, c). The HAADF image and EDS mapping of Zr-TCBPE-MOL-Ru

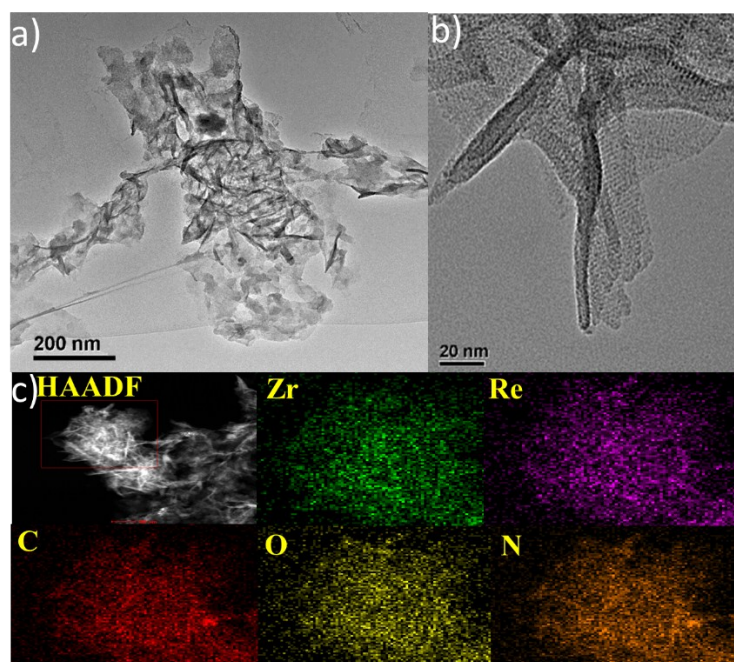

Figure s3 a). The TEM image of Zr-TCBPE-MOL-Re, b). HRTEM of Zr-TCBPE-MOL-Re, c). The HAADF image and EDS mapping of Zr-TCBPE-MOL-Re

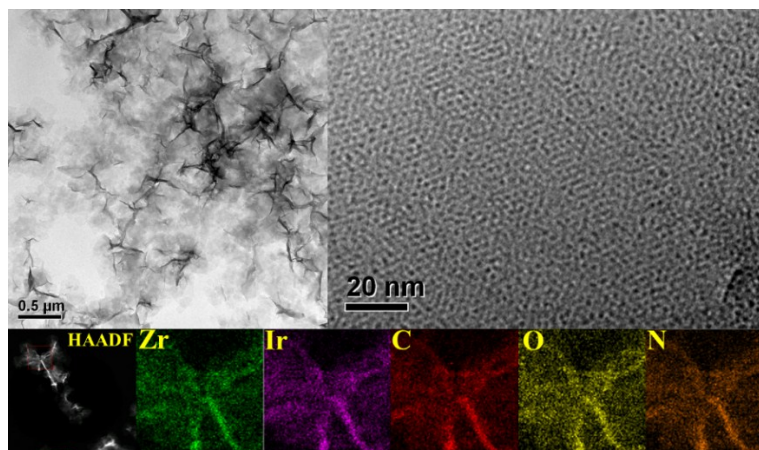

Figure s4 a). The TEM image of Zr-TCBPE-MOL-Ir, b). HRTEM of Zr-TCBPE-MOL-Ir, c). The HAADF image and EDS mapping of Zr-TCBPE-MOL-Ir

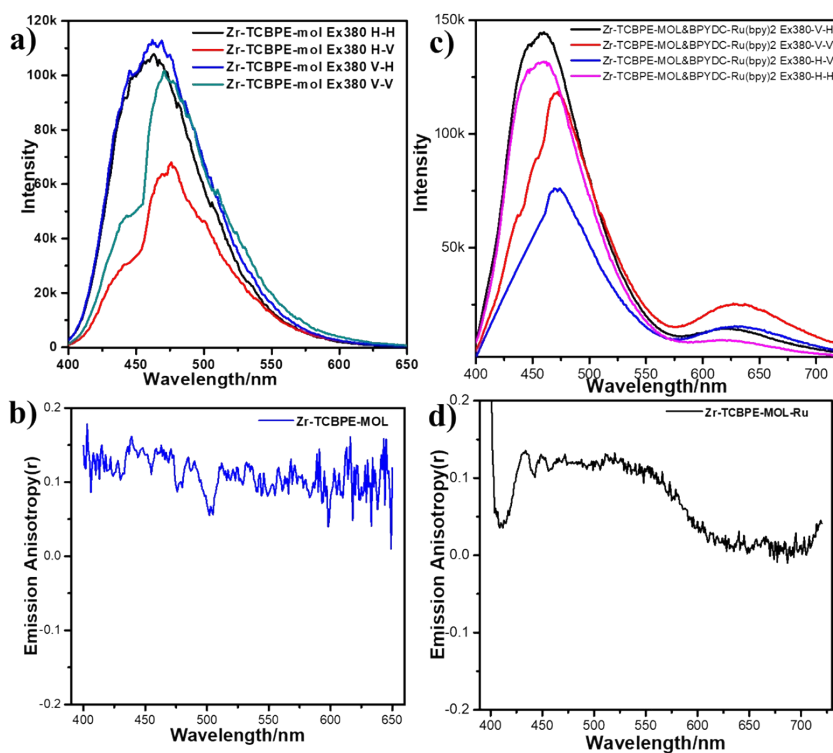

Figure s5 The polarized fluorescence spectrum and corresponding emission anisotropy value of Zr-TCBPE-MOL(a&b) and Zr-TCBPE-MOL-Ru (c&d)

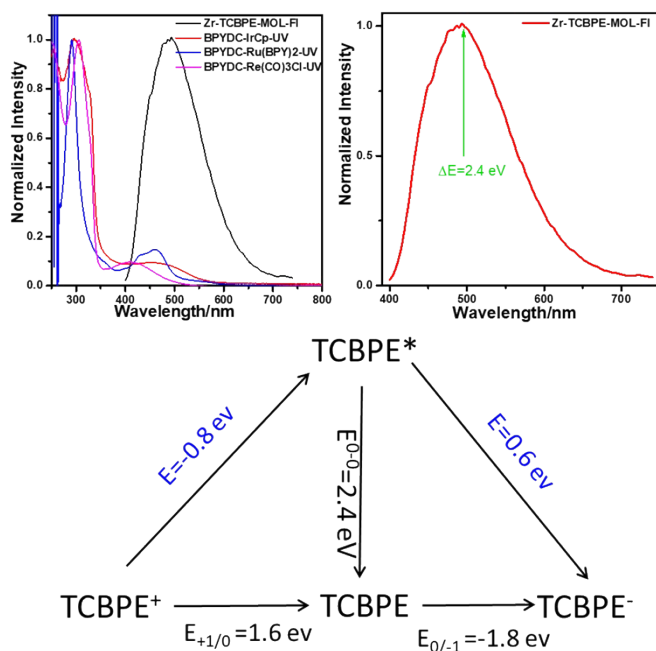

Figure s6 The normalized UV-Vis spectrum of  $[\text{H}_2\text{BPYDC-Ru}(\text{BPY})_2]\text{Cl}_2$ ,  $\text{H}_2\text{BPYDC-Re}(\text{CO})_3\text{Cl}$ , and  $[\text{H}_2\text{BPYDC-IrCp}^*\text{OH}]\text{NO}_3$  and the fluorescence spectrum of Zr-TCBPE-MOL, and the redox potential calculation of ligand TCBPE.

The redox potentials of TCBPE should be close to that of the TPE core, which are  $E_{\text{ox}1}=1.6\text{v}$  (vs NHE,  $\text{TPE}^+/\text{TPE}^0$ ),  $E_{\text{ox}2}=1.91\text{v}$  (vs NHE,  $\text{TPE}^{2+}/\text{TPE}^+$ ) (J. Org. Chem. 2007, 72, 8054-8061) and  $E_{\text{red}}=-1.8\text{v}$  (vs NHE,  $\text{TPE}^0/\text{TPE}^-$ ) (J Electroanal Chem, 1984, 162, 189-206). In the meantime, the fluorescence spectrum of the TCBPE ligand indicates a  $\Delta E$  value close to 2.4eV. Combining this ground state/excited state energy difference with the redox potentials of the TPE, we can estimate the redox potential of  $\text{TCBPE}^+/\text{TCBPE}^*$  and  $\text{TCBPE}^*/\text{TCBPE}^-$  to be -0.8 V and 0.6 V vs NHE, respectively. These redox potentials are not sufficient for electron transfer to/from  $[\text{H}_2\text{BPYDC-Ru}(\text{BPY})_2]\text{Cl}_2$  ( $E_{\text{ox}1}=1.26\text{v}$  vs NHE for  $[\text{H}_2\text{BPYDC-Ru}(\text{BPY})_2]^{3+}/[\text{H}_2\text{BPYDC-Ru}(\text{BPY})_2]^{2+}$  and  $E_{\text{red}}=-1.28\text{v}$  vs NHE for  $[\text{H}_2\text{BPYDC-Ru}(\text{BPY})_2]^{2+}/[\text{H}_2\text{BPYDC-Ru}(\text{BPY})_2]^+$ ),  $\text{H}_2\text{BPYDC-Re}(\text{CO})_3\text{Cl}$  ( $E_{\text{red}}=-0.9\text{v}$  vs NHE for  $[\text{H}_2\text{BPYDC-Re}(\text{CO})_3]^+ / [\text{H}_2\text{BPYDC-Re}(\text{CO})_3]^0$ ), and  $[\text{H}_2\text{BPYDC-IrCp}^*\text{OH}]\text{NO}_3$  ( $E_{\text{ox}1}\sim 1.5\text{v}$  vs NHE  $[\text{H}_2\text{BPYDC-IrCp}^*(\text{OH})]^+ / [\text{H}_2\text{BPYDC-IrCp}^*(\text{OH})]^0$ ,  $E_{\text{red}}=-1.07\text{v}$  vs  $\text{Fc}^{+/0}$   $[\text{BPY-IrCp}^*\text{CH}_3\text{CN}]^{2+} / [\text{BPY-IrCp}^*\text{CH}_3\text{CN}]^+$ ).

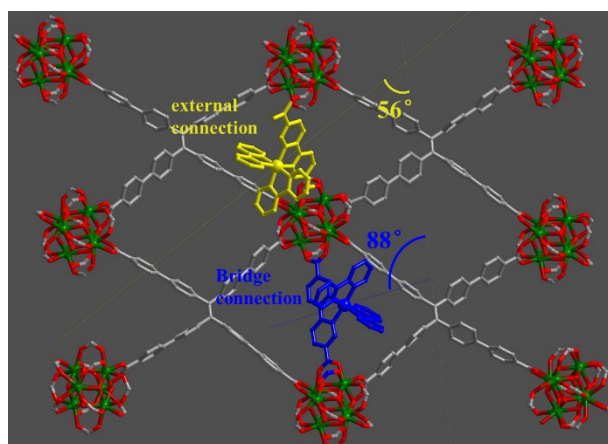

Figure s7 The two possible connection modes of linear dicarboxylate ligands on the MOL



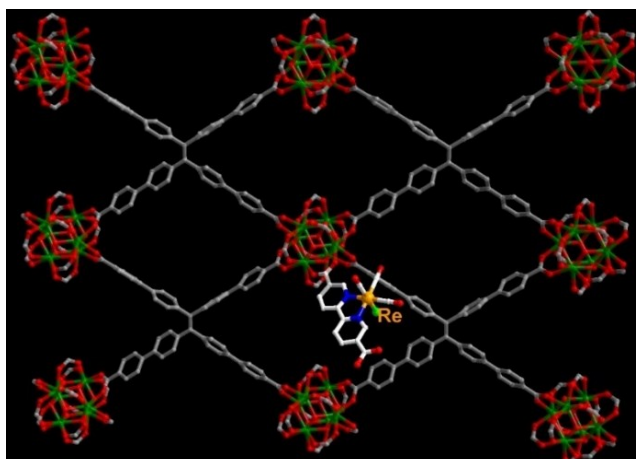

Figure s8 The structure model of Zr-TCBPE-MOL-Re

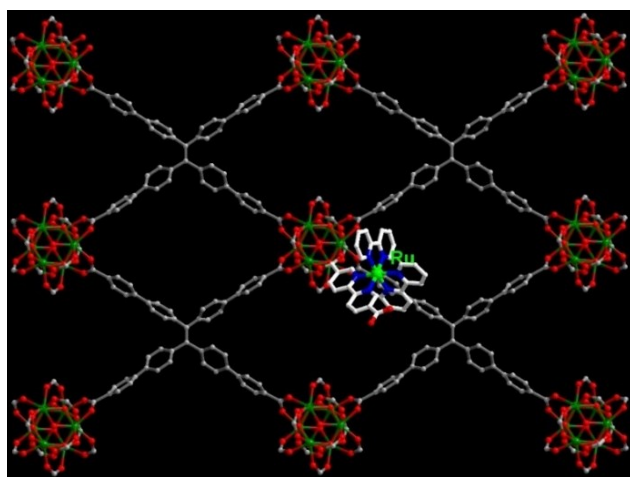

Figure s9 The structure model of Zr-TCBPE-MOL-Ru

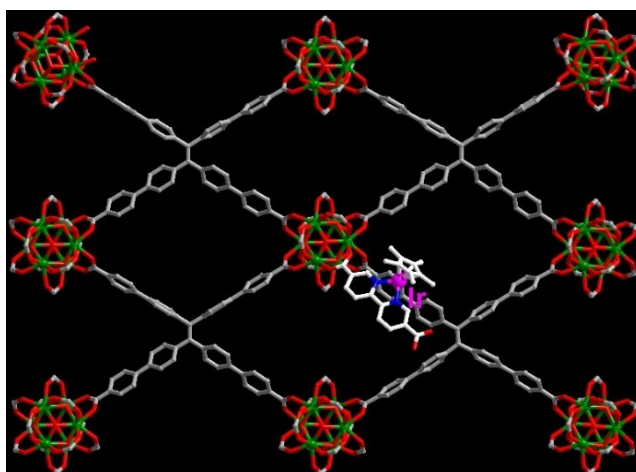

Figure s10 The structure model of Zr-TCBPE-MOL-Ir

Table s1 The ICP-MS analysis of Zr-TCBPE-MOL-Ir and Zr-TCBPE-MOL-Re

| Sample <sup>a</sup> | Zr        | Re      | Ir       | Zr <sub>6</sub> :Re | Zr <sub>6</sub> :Ir |
|---------------------|-----------|---------|----------|---------------------|---------------------|
| Zr-TCBPE-Re         | 305.5ppb  | 17.5ppb | ✗        | 6:1                 | ✗                   |
| Zr-TCBPE-Ir         | 715.6 ppb | ✗       | 19.6 ppb | ✗                   | 12.8:1              |

<sup>a</sup>The samples for ICP-MS analysis were prepared by the following procedure: 2.5 mg of catalyst was put in a teflon reactor, followed by adding 0.6 mL of concentrated HCl and 0.2 mL of concentrated HNO<sub>3</sub> and 0.1 mL of H<sub>2</sub>O<sub>2</sub>. The teflon reactor was sealed and kept at 160 °C for 5h. After cooling down, the solution was diluted to a total volume of 10 mL. The solution was then diluted for 100 times for the test.

Table s2 The reaction condition and catalysis result of CO<sub>2</sub> reduction

| Catalyst    | Solvent                                                   | Light      | Entry                                         |
|-------------|-----------------------------------------------------------|------------|-----------------------------------------------|
| Zr-TCBPE-Ir | 2.5 mg<br>1mL THF and<br>1mL H <sub>2</sub> O             | 400 nm LED | CO <sub>2</sub> &H <sub>2</sub> =1:3<br>1 bar |
| Zr-TCBPE-Re | 35 mg<br>27 mL MeCN, 1mL TEOA<br>and 1mL H <sub>2</sub> O | 400 nm LED | CO <sub>2</sub><br>1 bar                      |

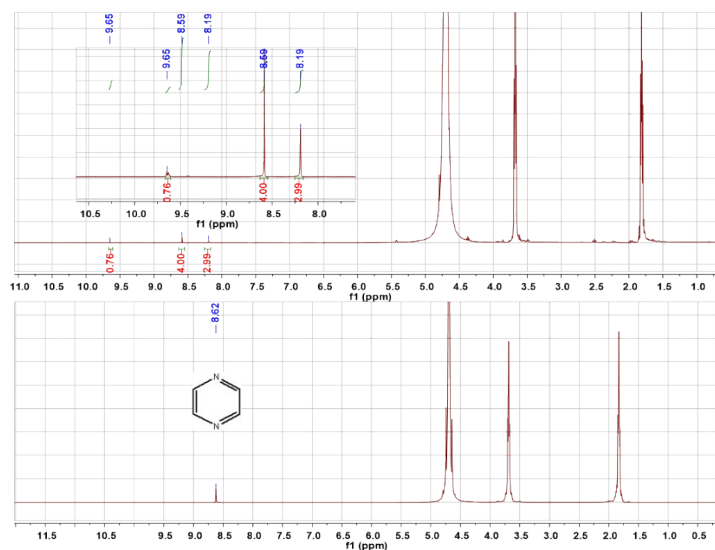

Figure s11 The <sup>1</sup>H-NMR of the reaction mixture after catalysis of CO<sub>2</sub> hydrogenation using Zr-TCBPE-MOL-Ir. Pyrazine was added as an internal standard and the solvent was H<sub>2</sub>O/D<sub>2</sub>O

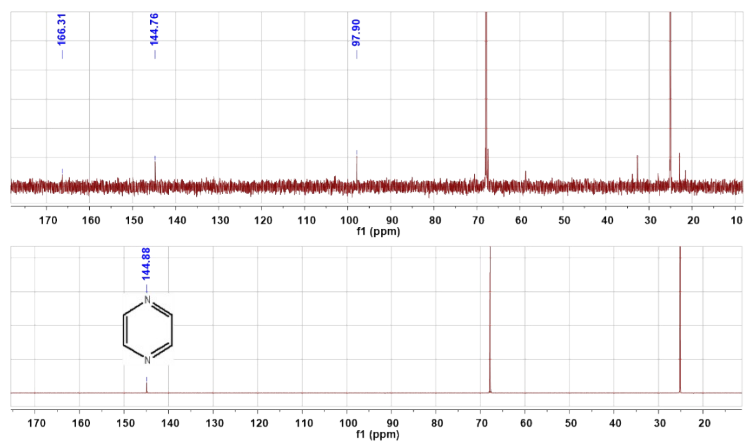

Figure s12 The  $^{13}\text{C}$ -NMR of the reaction mixture after catalysis of  $\text{CO}_2$  hydrogenation using Zr-TCBPE-MOL-Ir. Pyrazine was added as an internal standard and the solvent was  $\text{H}_2\text{O}/\text{D}_2\text{O}$
